# Supplementary material for: Assessing the impacts of reservoirs on the downstream flood frequency by coupling the effect of the scheduling-related multivariate rainfall into an indicator of reservoir effects
Source: Copernicus journal article supplement (doi:10.5194/hess-2019-42), 2019-03-19
Supplement: Supplementary file [file hess-2019-42-AC1-supplement.pdf]

## Reply to Referee #1

This study describes a modeling framework to account for the role of reservoirs in flood frequency analysis. While I think that the topic is generally of interest to the readership of this journal, I have a number of comments that should be addressed before considering it for publication.

### Response:

We are truly grateful for your positive comments and helpful suggestions. All your comments have been carefully addressed in the revised manuscript. Please see our point-by-point responses to your comments below.

-The manuscript needs to be proofread more carefully as there are several typos and unclear sentences. I will try point out some of these issues in the comments below, but this is not a complete list.

### Response:

Thanks for your advice. We have carefully proofread the manuscript to correct all issues about typos and unclear expressions.

- Line 26: what “previous study”?

### Response:

This is corrected as “López and Francés (2013)” in the revised manuscript.

- Lines 46-49: which of the two references is the quote from?

### Response:

This quote is summarized by Wyżga et al. (2016). In the revision, this sentence has been changed as follows:

---

River floods are generated by various complex nonlinear processes involving physical factors including “hydrological pre-conditions (e.g. soil saturation, snow cover), meteorological conditions (e.g. amount, intensity, and spatial and temporal distribution of rainfall), runoff generation processes as well as river routing (e.g. superposition of flood waves in the main river and its tributaries)” (Wyżga et al., 2016).

- Line 49: “nature extreme flow” is unclear.

### Response:

We have changed this sentence in the revised manuscript as follows:

---

In the absence of reservoirs, downstream flood extremes in most rain-dominated basins are mainly related to the corresponding extreme rainfall over the drainage area....

- Line 46: “this method makes it suitable”

**Response:**

We can't find this sentence on Line 46. It may be on Line 75. In the revision, this sentence has been rephrased as follows:

---

The continuous simulation method can explicitly account for the reservoir effects on flood in a hypothetical basin. However, it is difficult to apply this approach to the most real cases (Volpi et al., 2018). The simplifying assumptions are just satisfied in a few of basins with single small reservoir. Even if some basins satisfy the simplifying assumptions, the detailed data and information required in this approach are probably unavailable.

- Line 77: “the first approach”. Also, please add a reference to support the statement.

**Response:**

Corrected. In the revision, we have changed the statement for clarity as follows:

---

The continuous simulation method can explicitly account for the reservoir effects on flood in a hypothetical basin. However, it is difficult to apply this approach to the most real cases (Volpi et al., 2018). The simplifying assumptions are just satisfied in a few of basins with single small reservoir. Even if some basins satisfy the simplifying assumptions, the detailed data and information required in this approach are probably unavailable.

- Lines 95-96: unclear why you can't get the uncertainties in the estimates. Please clarify.

**Response:**

Thank you for pointing this out. We realize our statement is imprecise. This statement has been rephrased in the revised manuscript.

---

For model parameters, the ML can only get one estimate through maximization of the likelihood function, while the Bayesian inference can get multiple estimates, forming a posterior distribution of model parameters. Thus, the ML is inconvenient to describe the uncertainty of flood estimates associated with the model parameter uncertainty.

- Line 98: “all their cases”

Corrected.

- Line 104: “for the expression of the distribution”

**Response:**

Corrected.

- Line 106: “in the expression”

**Response:**

Corrected.

- Given that you use a GEV but leave the shape parameter constant (and this is fine), please add more 2-parameter distributions (e.g., lognormal, gamma, Weibull, Gumbel) which have only two parameters that you can make vary as a function of your covariates.

**Response:**

Thank you for this suggestion. In the revision, we have added the four 2-parameter distributions (i.e., lognormal, gamma, Weibull, Gumbel). The results are summarized in Table 7 (newly-added). The results indicate that for the AK and HZ station, the nonstationary WEI model with RRCI has a best performance, while for the HJG station, the nonstationary GA model with RRCI is the best model. In the revision, we have added Table 2 (newly-added) to summarize the used distributions. And the Table 6 and Table 7 are deleted. Detailed analyses of all new results will be included in the revised text. In the revised manuscript, all changes to Tables and Figures are listed as follows:

< Table 1> (revised)

<Table 2> (newly-added)

<Table 3> (Table 2 in the original manuscript; revised)

<Table 5> (Table 4 in the original manuscript; revised)

<Table 6> (Table 5 in the original manuscript; revised)

< Table 7> (newly-added)

< Table 8> (revised)

<Table 5 in the original manuscript> (deleted)

<Table 6 in the original manuscript> (deleted)

<Figure 1> (revised)

<Figure 5> (revised)

<Figure 6> (revised)

<Figure 7> (revised)

<Figure 8> (revised)

<Figure 9 in the original manuscript > (deleted)

- Line 132: “To analyze”

**Response:**

Corrected.

- Line 139: “The Eq. (1)”

**Response:**

Corrected.

- If I get this right, you are assuming that the sediment trapping capability of the reservoir is negligible. However, over time the amount of storage decreases. To account for the role of sediment in reducing the reservoir capacity over time, I highly recommend the use of the Brune curve to account for it. If not Brune curve, please account for it in some fashion.

**Response:**

Thank you for this good and insightful suggestion. To address your comment, RI is redefined to incorporate the impact of sediment on reducing the reservoir capacity over time in discussions. In the revision, RI is defined as

$$RI = \sum_{i=1}^N \left( \frac{A_i}{A_T} \right) \cdot \left( \frac{(1 - r_i^{Acc}) \cdot C_i}{R_m} \right) \quad (1)$$

where  $r_i^{Acc}$  is the loss rate (%) of reservoir capacity in the  $i$ -th reservoir, due to the sediment deposition. The results indicate the loss of the reservoir capacity have an effect but not too big in this study (Figure S2). This is because so far, main reservoirs (i.e., Dangjiangkou and Ankang reservoirs) have a small loss rate no more than 15% (Figure S1). The estimation of  $r_i^{Acc}$  has been presented in Supplementary Information (Please see Appendix A).

<Table S1> (newly-added)

<Figure S1> (newly-added)

<Figure S2> (newly-added)

Equation 1 is revised.

Equation S1 is newly-added.

Equation S2 is newly-added.

- Line 157: “the greater the MRI impact”

**Response:**

Corrected.

- Line 158: what does “inflexible” mean in this context?

**Response:**

We realize that the word “inflexible” may be inappropriate. Here, what we want to express is that the reservoir scheduling will have more constraints from the MRI. For example, when a large volume MRI occurs and its timing is near the end of flood season, the reservoir will probably face a large peak of inflow and a insufficient residual capacity due to reservoir impounding. The above explanation will be added in the revised manuscript.

- Line 161: “where”

**Response:**

Corrected.

- In terms of predictors, the spatial distribution of rainfall is not really captured. I can think of situations in which the same basin-averaged rainfall will have very different effects if most of the rainfall occurs far or close to the outlet. How is this addressed here?

**Response:**

Thank you for your comments. To capture the spatial distribution of rainfall, the distance ( $L$ ) between the station with the maximum rainfall and the outlet have been considered. However, the results in Figure 5 (revised) show that for HZ station with the drainage area of  $142056 \text{ km}^2$ , there is a weak positive linear correlation (Pearson's  $r=0.24$ ) between  $L$  and AMDF, while for the AK station with the drainage area of  $38600 \text{ km}^2$  and the HJG station  $90491 \text{ km}^2$ , the linear correlation between  $L$  and AMDF is not significant. In the revised manuscript, this variable is considered as candidate to capture the spatial distribution of rainfall, but this variable is not selected for the calculation of RRCI, in consideration of both the non-significance correlation with floods of the study stations and the very complex fitting of 5-dimension copula.

- Line 185: “marginals”

**Response:**

Corrected.

- Line 204: “extensively concerned” is unclear.

**Response:**

- Line 208: what does “obeys nonstationary distribution” mean?

**Response:**

We have revised this statement as follows:

---

Suppose that flood variable  $Y_t$  obeys distribution  $f_{Y_t}(y_t|\boldsymbol{\eta}_t)$  with the covariate-dependent distribution parameters  $\boldsymbol{\eta}_t$ .

- What about model selection based on the SBC index? Would you get a more parsimonious model?

**Response:**

Thank you for your suggestion. In the revised manuscript, we have added the SBC index. And a more parsimonious model is selected based on the SBC criterion. After adding four 2-parameter distributions (i.e., lognormal, gamma, Weibull, Gumbel), the detailed results have been summarized in Table 7 (newly-added).

- Line 254: I don't think this statement is correct, given that you would be able to say whether a more complex model should be selected over a more complex one, not if the fit is good or bad.

**Response:**

Thank you. This statement has been deleted. In the revised manuscript, the chi-square test has been replaced by the SBC criterion.

- Line 266: “, and was completed”

**Response:**

Corrected.

- Line 281: what is the definition of “timing”?

**Response:**

The timing is defined as the time on which day of the year the annual maximum daily flood occurred. In the revision, the definition of “timing” will be added.

- Line 303: what does “special” mean?

**Response:**

In the revision, this sentence has been deleted.

- Line 314: “was calculated”

**Response:**

Corrected.

- In fitting the copulas, the marginals were treating as stationary. Is this really the case? Please test for the presence of nonstationarities in the marginals of the predictors. If nonstationary, please account for it.

**Response:**

Thanks. In the revision, the change-points of the variables are tested by the Pettitt test, and then, if any, the marginal with the change-point will be addressed by the estimation method (Xiong et al., 2015). The results in Table S2 show that there are the significant change-points in the mean intensity ( $I$ ) of the AK and HJG stations and in the volume ( $V$ ) of the HJG station. Results in Table 5 indicate that the consideration of the nonstationarity in these marginals makes little difference.

< Table S2> (newly-added)

- The role of the Mann-Kendall and Pettitt tests is unclear to me. First of all, the results are discussed at a very basic and superficial level. Also, if the response variable tends to change with time but because the predictors you have selected change over time as well, then whether  $Y$  is stationary or not is not very important; however, whether the relationship between predictors and predictand doesn't change over time becomes more relevant. Please fix this part.

**Response:**

Thanks. Here, the Mann-Kendall and Pettitt tests are indeed non-essential. We have deleted the Mann-Kendall and Pettitt tests in the revised manuscript.

It is hard to demonstrate whether the relationship between predictors and predictand doesn't change over time in this study. But this issue can be covered, because under the Bayesian framework, the uncertainty of the change of this relationship will be reflected in the posteriori distribution of model parameters.

- Lines 362-364: Please apply a correction to account for the fact you are performing multiple hypothesis testing

**Response:**

The correction has been made.

- Line 374: “explains”

**Response:**

Corrected.

- Line 391: “for every certain multivariate MRI” is unclear.

**Response:**

Revised.

- Line 402: “It is of interest”

**Response:**

Corrected.

- Line 404: “the remaining capacity of the reservoir”

**Response:**

Corrected.

- Line 409: “due to correspond to” is unclear

**Response:**

Revised.

- Line 423: “related to the construction”

**Response:**

Corrected.

- Line 427: “is weak”; “The comparison”

**Response:**

Corrected.

- Line 428: “indicates”



**Response:**

Corrected.

- Line 429: “in most cases”

**Response:**

Corrected.

- Line 435: “100-year”

**Response:**

Corrected.

- Line 649: “thick blue” what?

**Response:**

We have changed this in the revised manuscript as follows:

---

...the thick blue lines...

- Line 651: “The right panels are”

**Response:**

Corrected.

## Tables (revised and newly-added)

Table 1. Seven scenarios for the formulas of the two distribution parameters (i.e.,  $\mu_t$   
 $\sigma_t$ ).

| Scenario codes | The formula of distribution parameters |                                   |
|----------------|----------------------------------------|-----------------------------------|
|                | $g_1(\mu_t)$                           | $g_2(\sigma_t)$                   |
| S0             | $\mu_0$                                | $\sigma_0$                        |
| S11            | $\mu_0 + \mu_1 \text{RI}$              | $\sigma_0$                        |
| S12            | $\mu_0$                                | $\sigma_0 + \sigma_1 \text{RI}$   |
| S13            | $\mu_0 + \mu_1 \text{RI}$              | $\sigma_0 + \sigma_1 \text{RI}$   |
| S21            | $\mu_0 + \mu_1 \text{RRCI}$            | $\sigma_0$                        |
| S22            | $\mu_0$                                | $\sigma_0 + \sigma_1 \text{RRCI}$ |
| S23            | $\mu_0 + \mu_1 \text{RRCI}$            | $\sigma_0 + \sigma_1 \text{RRCI}$ |

Table 2. Summary of the probability density functions and the used link functions for nonstationary frequency modeling of the flood series.

| Distributions                    | Probability density functions                                                                                                                                                                                                                                                                                   | Link functions                                            |
|----------------------------------|-----------------------------------------------------------------------------------------------------------------------------------------------------------------------------------------------------------------------------------------------------------------------------------------------------------------|-----------------------------------------------------------|
| Gamma (GA)                       | $f_Y(y \mu_t, \sigma_t) = \frac{(y)^{1/\sigma_t^2-1}}{\Gamma(1/\sigma_t^2)(\mu_t \sigma_t^2)^{1/\sigma_t^2}} \exp\left(-\frac{y}{\mu_t \sigma_t^2}\right)$ $y > 0, \mu_t > 0, \sigma_t > 0$                                                                                                                     | $g_1(\mu_t) = \ln(\mu_t)$ $g_2(\sigma_t) = \ln(\sigma_t)$ |
| Weibull (WEI)                    | $f_Y(y \mu_t, \sigma_t) = \left(\frac{\sigma_t}{\mu_t}\right) \left(\frac{y}{\mu_t}\right)^{\sigma_t-1} \exp\left(-\left(\frac{y}{\mu_t}\right)^{\sigma_t}\right)$ $y > 0, \mu_t > 0, \sigma_t > 0$                                                                                                             | $g_1(\mu_t) = \ln(\mu_t)$ $g_2(\sigma_t) = \ln(\sigma_t)$ |
| Lognormal (LOGNO)                | $f_Y(y \mu_t, \sigma_t) = \frac{1}{y\sigma_t\sqrt{2\pi}} \exp\left\{-\frac{[\log(y) - \mu_t]^2}{2\sigma_t^2}\right\}$ $y > 0, -\infty < \mu_t < \infty, \sigma_t > 0$                                                                                                                                           | $g_1(\mu_t) = \ln(\mu_t)$ $g_2(\sigma_t) = \ln(\sigma_t)$ |
| Gumbel (GU)                      | $f_Y(y \mu_t, \sigma_t) = \frac{1}{\sigma_t} \exp\left\{\left[\left(\frac{y - \mu_t}{\sigma_t}\right) - \exp\left(\frac{y - \mu_t}{\sigma_t}\right)\right]\right\}$ $-\infty < y < \infty, -\infty < \mu_t < \infty, \sigma_t > 0$                                                                              | $g_1(\mu_t) = \mu_t$ $g_2(\sigma_t) = \ln(\sigma_t)$      |
| Generalized Extremes Value (GEV) | $f_Y(y \mu_t, \sigma_t, \xi) = \frac{1}{\sigma_t} \left[1 + \xi \left(\frac{y - \mu_t}{\sigma_t}\right)\right]^{-1/\xi-1} \exp\left\{-\left[1 + \xi \left(\frac{y - \mu_t}{\sigma_t}\right)\right]^{-1/\xi}\right\}$ $y > \mu_t - \sigma_t/\xi, -\infty < \mu_t < \infty, \sigma_t > 0, -\infty < \xi < \infty$ | $g_1(\mu_t) = \mu_t$ $g_2(\sigma_t) = \ln(\sigma_t)$      |

Table 3. The information of the reservoirs in the Hanjiang River basin.

| Reservoirs   | Longitude | Latitude | Area (km <sup>2</sup> ) | Year | Capacity (10 <sup>9</sup> m <sup>3</sup> ) |
|--------------|-----------|----------|-------------------------|------|--------------------------------------------|
| Shiquan      | 108.05    | 33.04    | 23400                   | 1974 | 0.566                                      |
| Ankang       | 108.83    | 32.54    | 35700                   | 1992 | 3.21                                       |
| Huanglongtan | 110.53    | 32.68    | 10688                   | 1978 | 1.17                                       |
| Dangjiangkou | 111.51    | 32.54    | 95220                   | 1967 | 34                                         |
| Yahekou      | 112.49    | 33.38    | 3030                    | 1960 | 1.32                                       |

Table 5. Correlation coefficients between the RRCI and the AMDF.

| Subset of<br>rainfall<br>variables | AK           |              |              | HJG          |              |              | HZ           |              |              |
|------------------------------------|--------------|--------------|--------------|--------------|--------------|--------------|--------------|--------------|--------------|
|                                    | Pearson      | Kendall      | Spearman     | Pearson      | Kendall      | Spearman     | Pearson      | Kendall      | Spearman     |
| -*                                 | -0.37        | -0.18        | -0.28        | -0.55        | -0.37        | -0.54        | -0.53        | -0.38        | -0.55        |
| <i>M</i>                           | -0.27        | -0.27        | -0.37        | -0.67        | -0.53        | -0.74        | -0.45        | -0.37        | -0.51        |
| <i>I</i>                           | -0.26        | -0.25        | -0.34        | <b>-0.74</b> | -0.57        | -0.79        | -0.54        | -0.41        | -0.56        |
| <i>V</i>                           | -0.32        | -0.28        | -0.39        | -0.63        | -0.49        | -0.69        | -0.57        | -0.48        | -0.65        |
| <i>T</i>                           | -0.11        | -0.17        | -0.24        | -0.68        | -0.55        | -0.73        | -0.48        | -0.40        | -0.57        |
| <i>M, I</i>                        | -0.36        | -0.28        | -0.38        | -0.70        | -0.56        | -0.77        | -0.56        | -0.43        | -0.58        |
| <i>M, V</i>                        | -0.42        | -0.29        | -0.40        | -0.64        | -0.50        | -0.71        | -0.56        | -0.45        | -0.60        |
| <i>M, T</i>                        | -0.37        | -0.26        | -0.36        | -0.69        | -0.57        | -0.77        | -0.64        | -0.46        | -0.63        |
| <i>I, V</i>                        | -0.46        | -0.31        | -0.42        | -0.71        | -0.54        | -0.76        | -0.65        | -0.50        | -0.67        |
| <i>I, T</i>                        | -0.34        | -0.22        | -0.31        | -0.73        | <b>-0.60</b> | <b>-0.80</b> | -0.68        | -0.50        | -0.66        |
| <i>V, T</i>                        | -0.43        | -0.28        | -0.39        | -0.68        | -0.55        | -0.75        | -0.69        | -0.52        | -0.71        |
| <i>M, I, V</i>                     | -0.49        | -0.31        | -0.42        | -0.65        | -0.53        | -0.74        | -0.63        | -0.47        | -0.63        |
| <i>M, I, T</i>                     | -0.41        | -0.27        | -0.37        | -0.68        | -0.57        | -0.78        | -0.67        | -0.49        | -0.66        |
| <i>M, V, T</i>                     | -0.50        | -0.29        | -0.40        | -0.65        | -0.56        | -0.76        | -0.67        | -0.49        | -0.67        |
| <i>I, V, T</i>                     | -0.51        | -0.31        | -0.41        | -0.67        | -0.58        | -0.78        | <b>-0.71</b> | <b>-0.53</b> | <b>-0.70</b> |
| <i>M, I, V, T</i>                  | <b>-0.53</b> | <b>-0.31</b> | <b>-0.42</b> | -0.65        | -0.57        | -0.77        | -0.69        | -0.52        | -0.69        |

\*The values in the first row are the correlation coefficients between RI and flood seires

Table 6. Results of copula models.

| Stations | Scheduling-related variables | Pairs | Copula type | Parameters $\theta_c$ | Kendall's tau | Goodness-of-fit test based on the empirical copula |         |
|----------|------------------------------|-------|-------------|-----------------------|---------------|----------------------------------------------------|---------|
|          |                              |       |             |                       |               | CvM*                                               | p-value |
| AK       | $M, I, V, T$                 | 14    | Clayton     | 0.16                  | 0.08          | 0.169                                              | 0.86    |
|          |                              | 13    | Clayton     | 1.28                  | 0.39          |                                                    |         |
|          |                              | 12    | Clayton     | 1.01                  | 0.33          |                                                    |         |
|          |                              | 24 1  | Frank       | 1.21                  | 0.17          |                                                    |         |
|          |                              | 23 1  | Frank       | -2.24                 | -0.24         |                                                    |         |
|          |                              | 34 12 | Clayton     | 0.96                  | 0.11          |                                                    |         |
| HJG      | $I, T$                       | 24    | Clayton     | 1.37                  | 0.41          | 0.473                                              | 0.425   |
| HZ       | $I, V, T$                    | 24    | Gumbel      | 1.12                  | 0.11          | 0.181                                              | 0.82    |
|          |                              | 23    | Clayton     | 1.31                  | 0.40          |                                                    |         |
|          |                              | 34 2  | Clayton     | 0.49                  | 0.2           |                                                    |         |

\* CvM is the statistic of the Cramer-von Mises test; if the p-value of the C-vine copula model is less than the significance level of 0.05, the model is considered to be not consistent with the empirical copula.

Table 7. Summary of results of the nonstationary distribution models.

| Stations | Covariates | Distributions | The optimal formulas* of distribution parameters |                    |                       |         | AIC    | SBC           |
|----------|------------|---------------|--------------------------------------------------|--------------------|-----------------------|---------|--------|---------------|
|          |            |               | Selected models                                  | $\mu_t$            | $\sigma_t$            | $\xi_0$ |        |               |
| AK       | RI         | GA            | WEI_S23                                          | exp(9.24-2.64RI)   | exp(-0.769+2.9RI)     | -       | 1177.2 | 1185.5        |
|          | RI         | WEI           |                                                  | exp(9.36-2.83RI)   | exp(0.882-3.18RI)     | -       | 1176.9 | 1185.3        |
|          | RI         | LOGNO         |                                                  | exp(9.14-3.86RI)   | exp(-0.716+3.28RI)    | -       | 1180.4 | 1188.8        |
|          | RI         | GU            |                                                  | 11875-13093RI      | exp(8.5)              | -       | 1199.6 | 1205.9        |
|          | RI         | GEV           |                                                  | 7685-15252RI       | exp(8.3)              | -0.043  | 1182.3 | 1190.6        |
|          | RRCI       | GA            |                                                  | exp(9.28-1.11RRCI) | exp(-0.825+0.689RRCI) | -       | 1165.3 | 1173.7        |
|          | RRCI       | WEI           |                                                  | exp(9.4-1.17RRCI)  | exp(0.982-0.884RRCI)  | -       | 1163.8 | <b>1172.2</b> |
|          | RRCI       | LOGNO         |                                                  | exp(9.19-1.33RRCI) | exp(-0.749+0.677RRCI) | -       | 1168.0 | 1176.4        |
|          | RRCI       | GU            |                                                  | 12555-7535RRCI     | exp(8.4)              | -       | 1188.0 | 1194.2        |
|          | RRCI       | GEV           |                                                  | 8460-6722RRCI      | exp(8.2)              | -0.096  | 1172.1 | 1180.5        |
| HJG      | RI         | GA            | GA_S21                                           | exp(9.7-1.62RI)    | exp(-0.25)            | -       | 1139.9 | 1146.0        |
|          | RI         | WEI           |                                                  | exp(9.75-1.56RI)   | exp(0.27)             | -       | 1141.4 | 1147.5        |
|          | RI         | LOGNO         |                                                  | exp(9.47-1.8RI)    | exp(-0.17)            | -       | 1140.9 | 1147.1        |
|          | RI         | GU            |                                                  | 17955-14399RI      | exp(8.8)              | -       | 1189.5 | 1195.7        |
|          | RI         | GEV           |                                                  | 6976-5930RI        | exp(8.79-1.49RI)      | 0.43    | 1149.9 | 1160.2        |
|          | RRCI       | GA            |                                                  | exp(9.99-1.99RRCI) | exp(-0.45)            | -       | 1112.5 | <b>1118.6</b> |
|          | RRCI       | WEI           |                                                  | exp(10.1-1.97RRCI) | exp(0.53)             | -       | 1113.2 | 1119.4        |
|          | RRCI       | LOGNO         |                                                  | exp(9.75-1.94RRCI) | exp(-0.38)            | -       | 1113.9 | 1120.1        |
|          | RRCI       | GU            |                                                  | 23067-20871RRCI    | exp(9.2-1.7RRCI)      | -       | 1121.3 | 1129.6        |
|          | RRCI       | GEV           |                                                  | 12113-10683RRCI    | exp(9.2-2.01RRCI)     | 0.051   | 1112.5 | 1122.8        |
| HZ       | RI         | GA            | WEI_S21                                          | exp(9.85-2.87RI)   | exp(-0.42)            | -       | 1198.3 | 1204.9        |
|          | RI         | WEI           |                                                  | exp(9.94-2.79RI)   | exp(0.49)             | -       | 1198.6 | 1204.9        |
|          | RI         | LOGNO         |                                                  | exp(9.63-2.93RI)   | exp(-0.33)            | -       | 1201.1 | 1207.4        |
|          | RI         | GU            |                                                  | 18661-23706RI      | exp(8.8)              | -       | 1237.5 | 1243.7        |
|          | RI         | GEV           |                                                  | 9605-13545RI       | exp(9.03-2.56RI)      | 0.099   | 1207.8 | 1218.3        |
|          | RRCI       | GA            |                                                  | exp(9.85-1.52RRCI) | exp(-0.61)            | -       | 1173.1 | 1179.4        |
|          | RRCI       | WEI           |                                                  | exp(9.92-1.42RRCI) | exp(0.73)             | -       | 1171.2 | <b>1177.5</b> |
|          | RRCI       | LOGNO         |                                                  | exp(9.72-1.55RRCI) | exp(-0.51)            | -       | 1178.7 | 1185.0        |
|          | RRCI       | GU            |                                                  | 19214-14344RRCI    | exp(8.86-0.881RRCI)   | -       | 1189.7 | 1198.1        |
|          | RRCI       | GEV           |                                                  | 12502-9911RRCI     | exp(8.96-1.37RRCI)    | -0.068  | 1176.0 | 1186.4        |

\*The model parameters in the optimal formulas are the posterior mean from Bayesian inference.

Table 8. The top-5 floods and the corresponding RRCI,  $P_{MRI}^\vee$  and scheduling-related rainfall variables after the construction (1967) of Danjiangkou reservoir in the HZ station.

| Year | AMDF (m <sup>3</sup> /s) | Values (Ranking in 1967-2015) |           |                |          |            |         |
|------|--------------------------|-------------------------------|-----------|----------------|----------|------------|---------|
|      |                          | RRCI                          | RI        | $P_{MRI}^\vee$ | $I$      | $V$        | $T$     |
| 1983 | 25600                    | 0.136 (2)                     | 0.294 (-) | 0.435 (2)      | 20.2 (1) | 121.4 (19) | 281 (2) |
| 1975 | 19900                    | 0.247 (7)                     | 0.295 (-) | 0.557 (7)      | 9.6 (18) | 163.6 (13) | 277 (6) |
| 1974 | 18200                    | 0.197 (4)                     | 0.296 (-) | 0.506 (4)      | 12.0 (7) | 120.4 (20) | 278 (4) |
| 2005 | 16800                    | 0.369 (12)                    | 0.301 (-) | 0.651 (11)     | 8.2 (27) | 179.7 (10) | 278 (4) |
| 1984 | 16100                    | 0.155 (3)                     | 0.294 (-) | 0.461 (3)      | 9.9 (15) | 256.3 (4)  | 273 (9) |



## Figures (revised and newly-added)

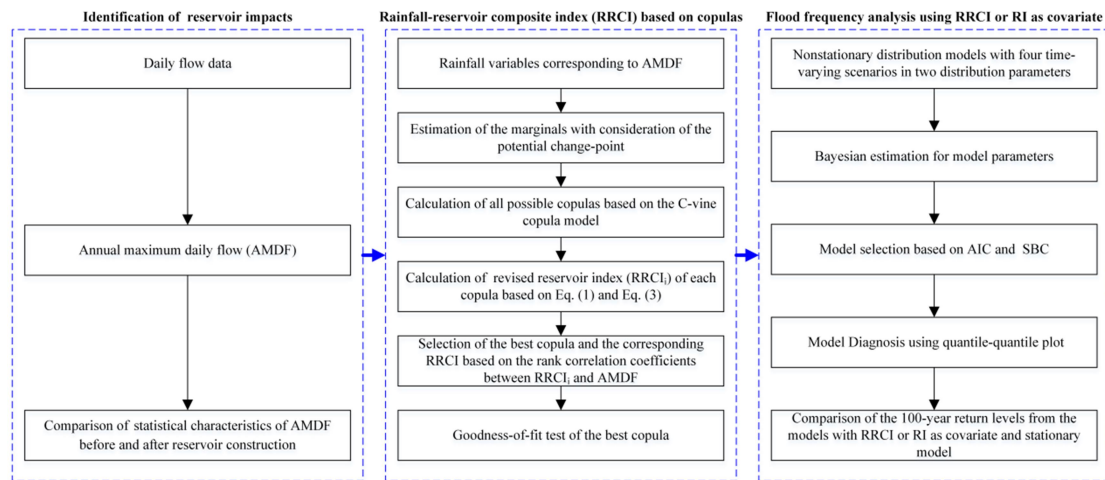

Figure 1. The flowchart of nonstationary covariate-based flood frequency analysis with a rainfall-reservoir composite index (RRCI).

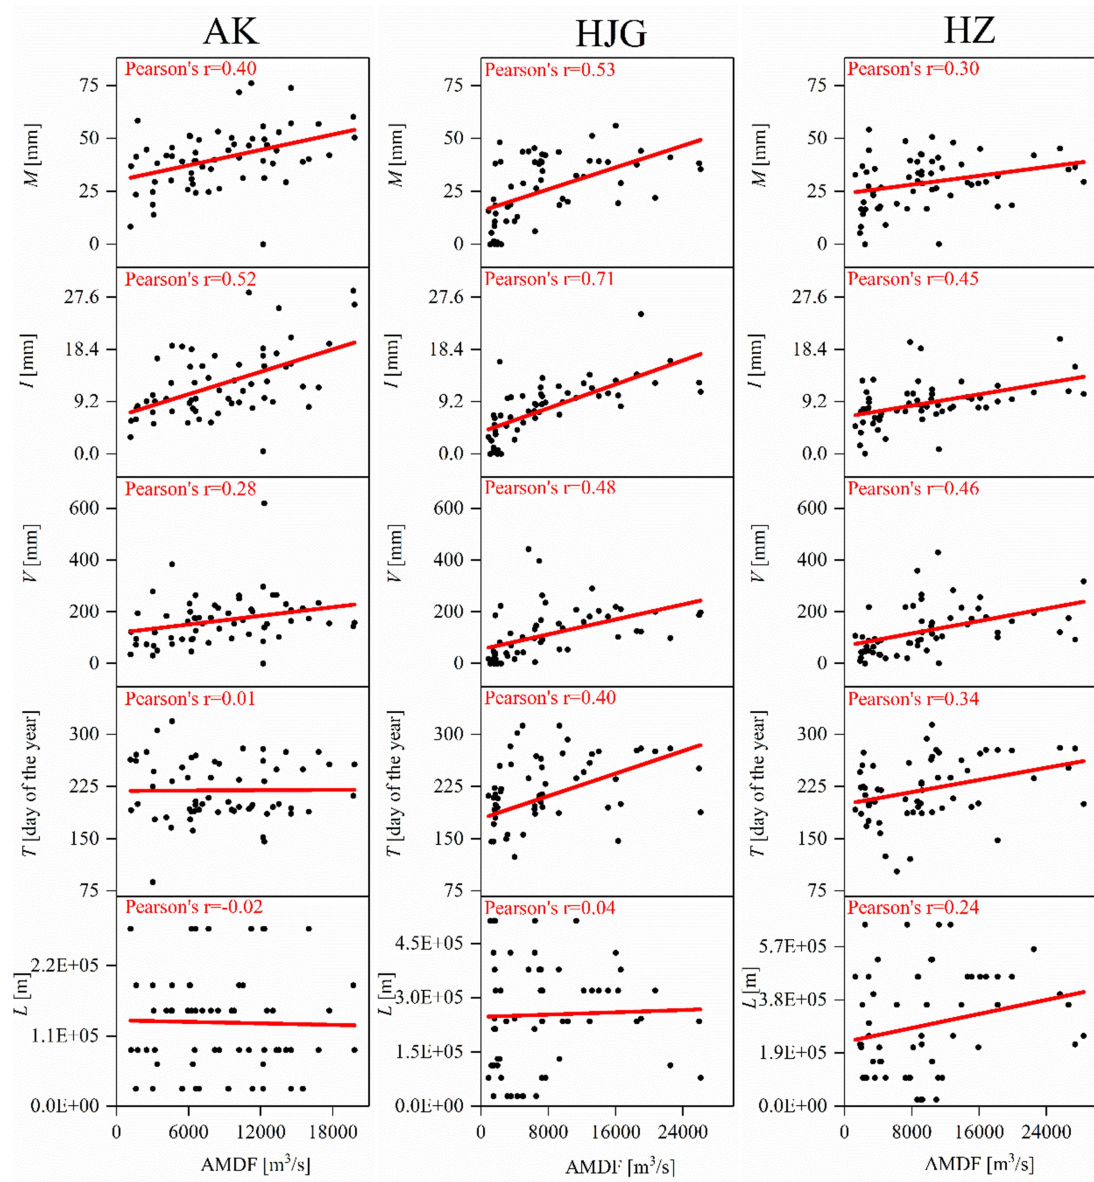

Figure 5. Linear correlation between the variables of multivariate MRI and AMDF.

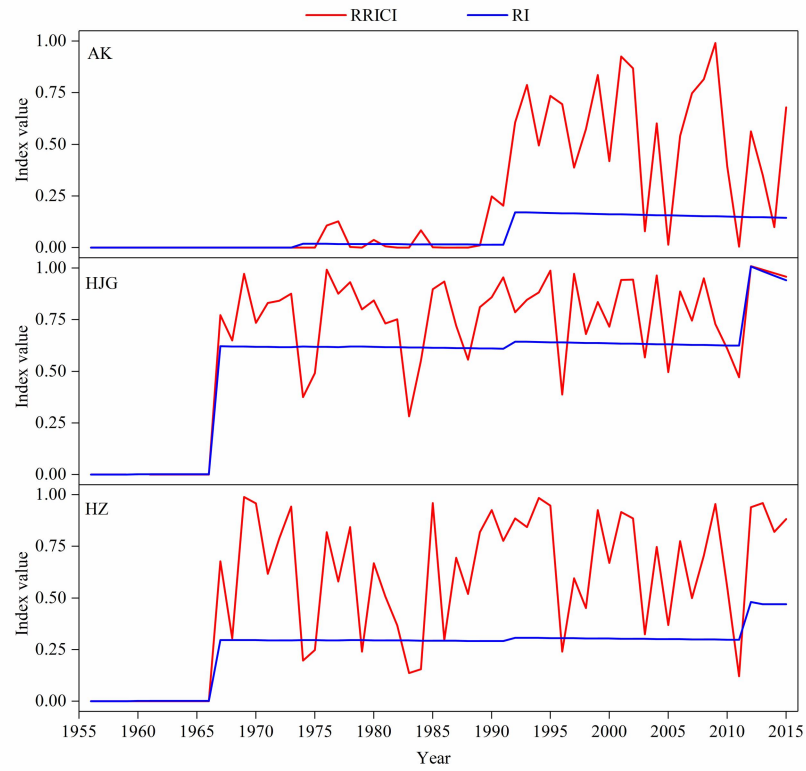

Figure 6. Variation of RI and RRICI.

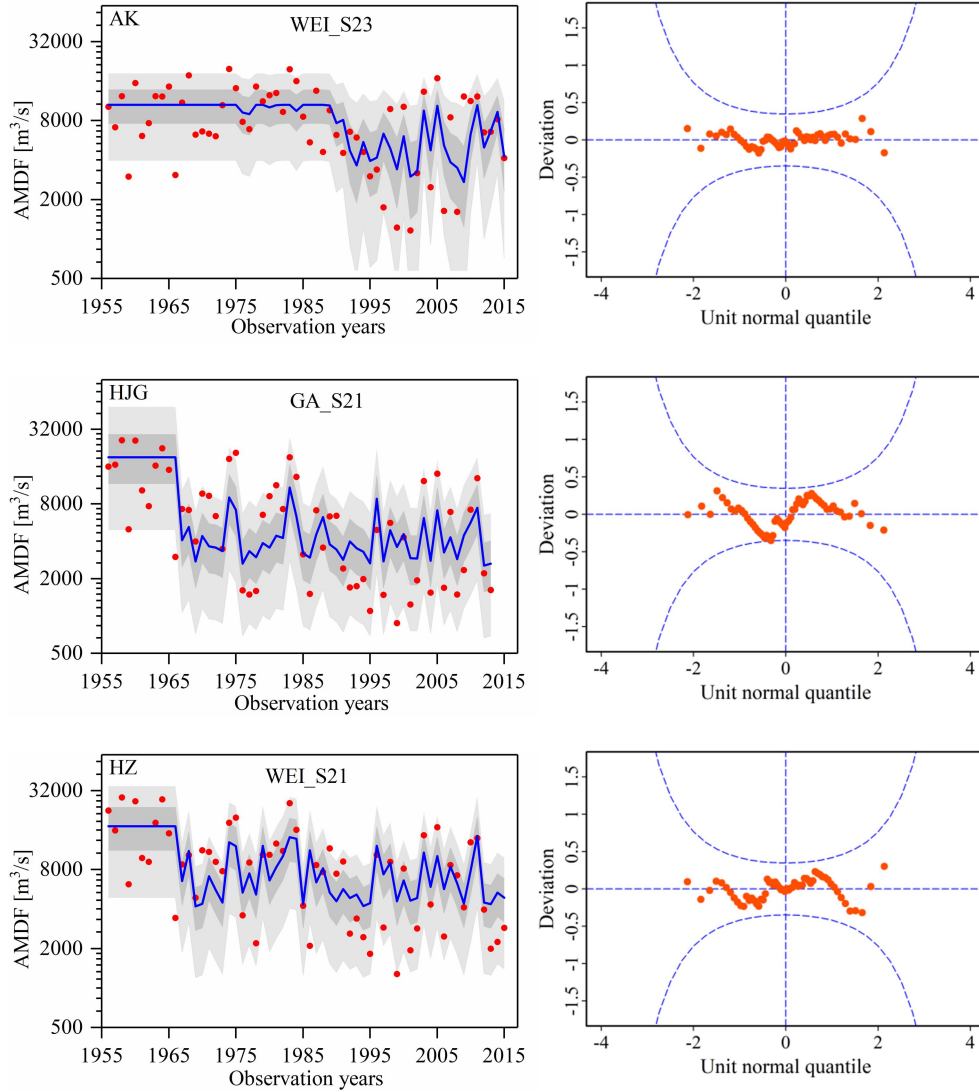

Figure 7. The performance of the best models (WEI\_S23 for AK station, GA\_S21 for HJG station and WEI\_S21 for HZ station). The left panels are the centile curves plots (the 50th centile curves are indicated by the thick blue lines; the light gray-filled areas are between the 5th and 95th centile curves; the dark grey-filled areas are between the 25th and 75th centile curves; the filled red points indicate the observed series). The right panels are the worm plots; a reasonable model should have the plotted points within the 95% confidence intervals (between the two blue dashed curves).

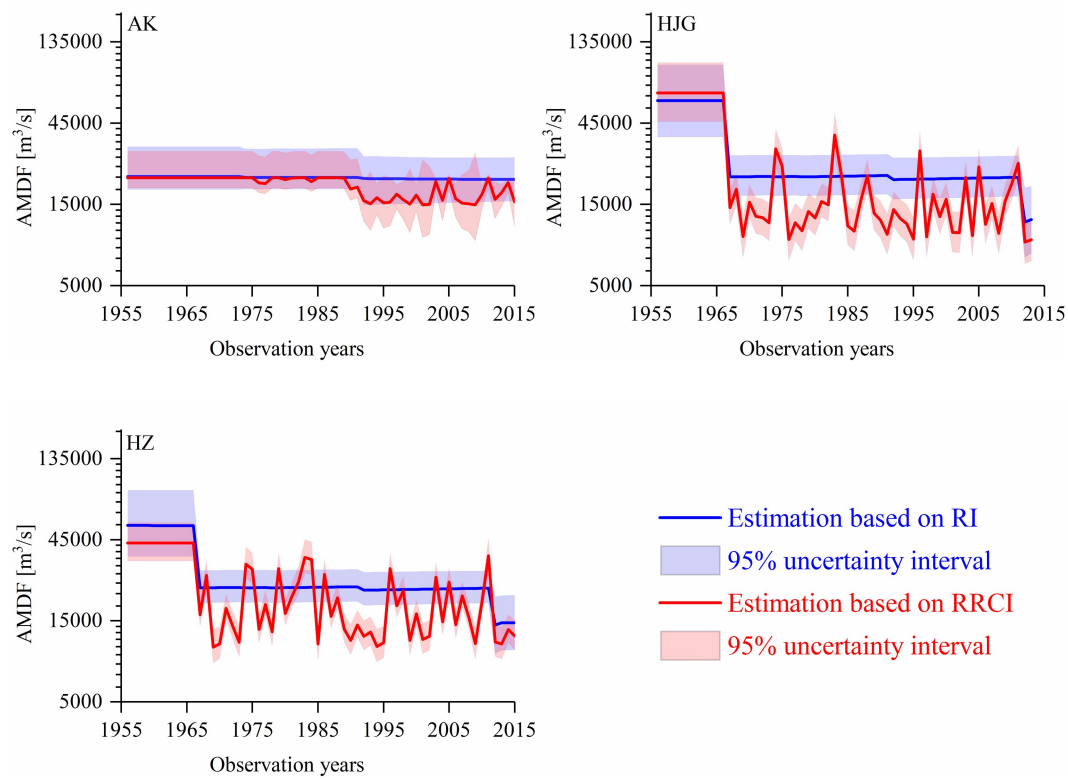

Figure 8. Statistical inference of the 100-year return levels from the models (WEI\_S13 and WEI\_S23 for AK station, GA\_S11 and GA\_S21 for HJG station and WEI\_S11 and WEI\_S21 for HZ station) with the 95% uncertainty interval.

## Appendix A: Supplementary Information

### The estimation of the loss rate (%) of reservoir capacity

In this study, to estimate the variation of  $r_i^{Acc}$  over time, it is assumed that there is the same amount of sediment in each year. Then,  $r_i^{Acc}$  is estimated by

$$r_i^{Acc} = \frac{n_i L_i^m}{C_i} = \frac{n_i \cdot w_i^s \cdot Te_i}{\rho C_i} \quad (S2)$$

where  $n_i$  is the number of years the  $i$ -th reservoir has been used,  $L_i^m$  is the mean of annual loss of reservoir capacity ( $m^3$ ),  $w_i^s$  is the mean of annual inflow sediment mass (kg),  $\rho$  is the density of the deposited sediment ( $kg/m^3$ ) and  $Te_i$  is the trap efficiency (%). Based on the Brune method (Brune, 1953; Mulu and Dwarakish, 2015), the trap efficiency is estimated with reservoir capacity-inflow ratio as follows

$$Te_i = 1 - \frac{0.5}{\sqrt{C_i/I_i}} \quad (S2)$$

where  $I_i$  is the mean of annual inflow volume in the  $i$ -th reservoir ( $m^3/day$ ). The data in the previous literature (Guo, 1995; Hu, 2009; Liu, 2017) are collected to control the estimation errors of  $L_i^m$ . Please see Table S1.

#### Reference:

- Hu, A.Y., 2009. Analysis of sedimentation characteristics of Danjiangkou Reservoir. Research in Soil and Water Conservation, 16(5):237-240. (In Chinese)
- Brune, G.M., 1953. Trap Efficiency of Reservoirs. Trans. Am. Geophysical Union, 34 (3), 407-418.
- Guo, J.M., 1995. Analysis of sedimentation in Ankang Reservoir and its impact on the reservoir operation. Northwest Hydropower, 1995(3):9-12. (In Chinese)
- Liu, J.X., 2017. Sedimentation characteristic analysis and desilting scheme optimization of Shiquan Reservoir. Pearl River, 38(1): 56-59. (In Chinese)
- Mulu, A., and Dwarakish G. S., 2015. Different Approach for Using Trap Efficiency for Estimation of Reservoir Sedimentation. An Overview, Aquatic Procedia, 4, 847-852.

Table S1. Summary for the calculation of the mean of annual loss of reservoir capacity

| Reservoirs   | $C_i$<br>( $10^9 \text{ m}^3$ ) | $I_i$<br>( $10^9 \text{ m}^3$ ) | $w_i^s$<br>( $10^9 \text{ kg}$ ) | $Te_i$<br>(%) | $L_i^m$ ( $10^9 \text{ m}^3$ ) |               |
|--------------|---------------------------------|---------------------------------|----------------------------------|---------------|--------------------------------|---------------|
|              |                                 |                                 |                                  |               | From previous studies          | From Eq.(S2)* |
| Shiquan      | 0.566                           | 11.73                           | 12.6                             | 88%           | 0.006                          | 0.008         |
| Ankang       | 3.21                            | 19.17                           | 27.1                             | 94%           | -                              | 0.018         |
| Huanglongtan | 1.17                            | 6.12                            | 8.58                             | 94%           | 0.007                          | 0.006         |
| Dangjiangkou | 34.0                            | 39.48                           | 59.8                             | 97%           | 0.044                          | 0.042         |
| Yahekou      | 1.32                            | 1.09                            | -                                | 98%           | 0.007                          | -             |

\*  $\rho = 1400 \text{ kg/m}^3$  .

Table S2. Results of the change-point detection for the rainfall series.

| Variables | AK           |              | HJG          |              | HZ           |         |
|-----------|--------------|--------------|--------------|--------------|--------------|---------|
|           | change-point | p-value*     | change-point | p-value      | change-point | p-value |
| <i>M</i>  | 1976         | 1.037        | 1989         | 0.371        | 1971         | 1.278   |
| <i>I</i>  | 1987         | <b>0.031</b> | 1985         | <b>0.009</b> | 1990         | 0.080   |
| <i>V</i>  | 2009         | 0.746        | 1984         | <b>0.042</b> | 1984         | 0.769   |
| <i>T</i>  | 1992         | 1.180        | 1984         | 0.986        | 1984         | 1.367   |

\*Less than 0.05 is considered significant.



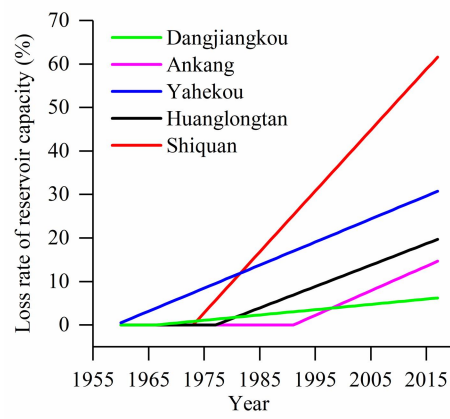

Figure S1. Interannual variation of loss rate of reservoir capacity for each reservoir in the study area.

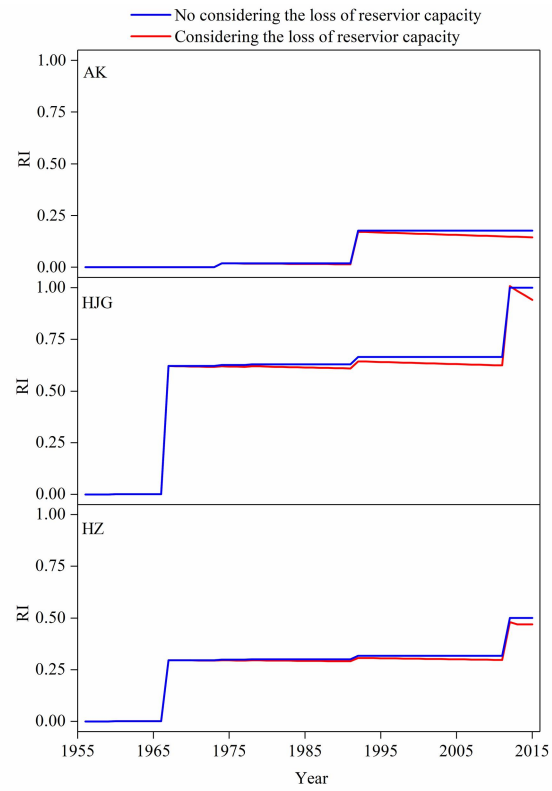

Figure S2. The impact of reservoir capacity loss on RI for AK, HJG and HZ stations.

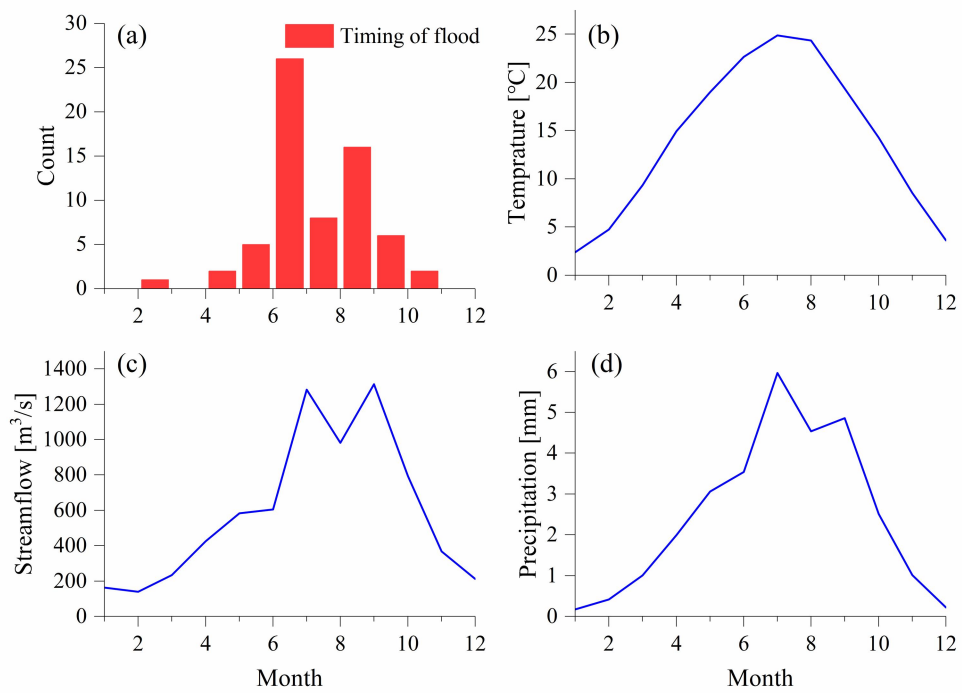

Figure S3 Preliminary analysis of the snowmelt contribution of the catchment upstream the AK station. (a) is the timing of flood; (b) is the monthly average temperature; (c) is the monthly average streamflow; and (d) is the monthly average precipitation.
